# Supplementary material for: Differential requirements of tubulin genes in mammalian forebrain development
Source: PubMed Central journal article supplement (PMC6697361; doi:10.1371/journal.pgen.1008243), 2019-08-06
Supplement: pgen.1008243.s002.pdf [file pgen.1008243.s002.pdf]

Wt: Wild-type  
 D1: D3963 homozygote  
 N: negative control  
 D2: D4222 homozygote

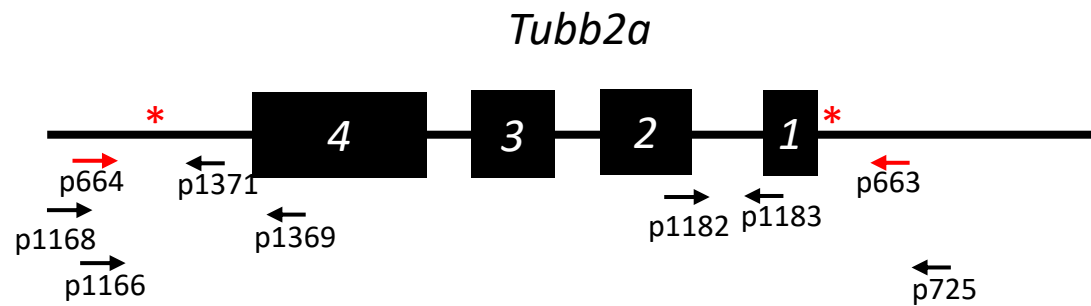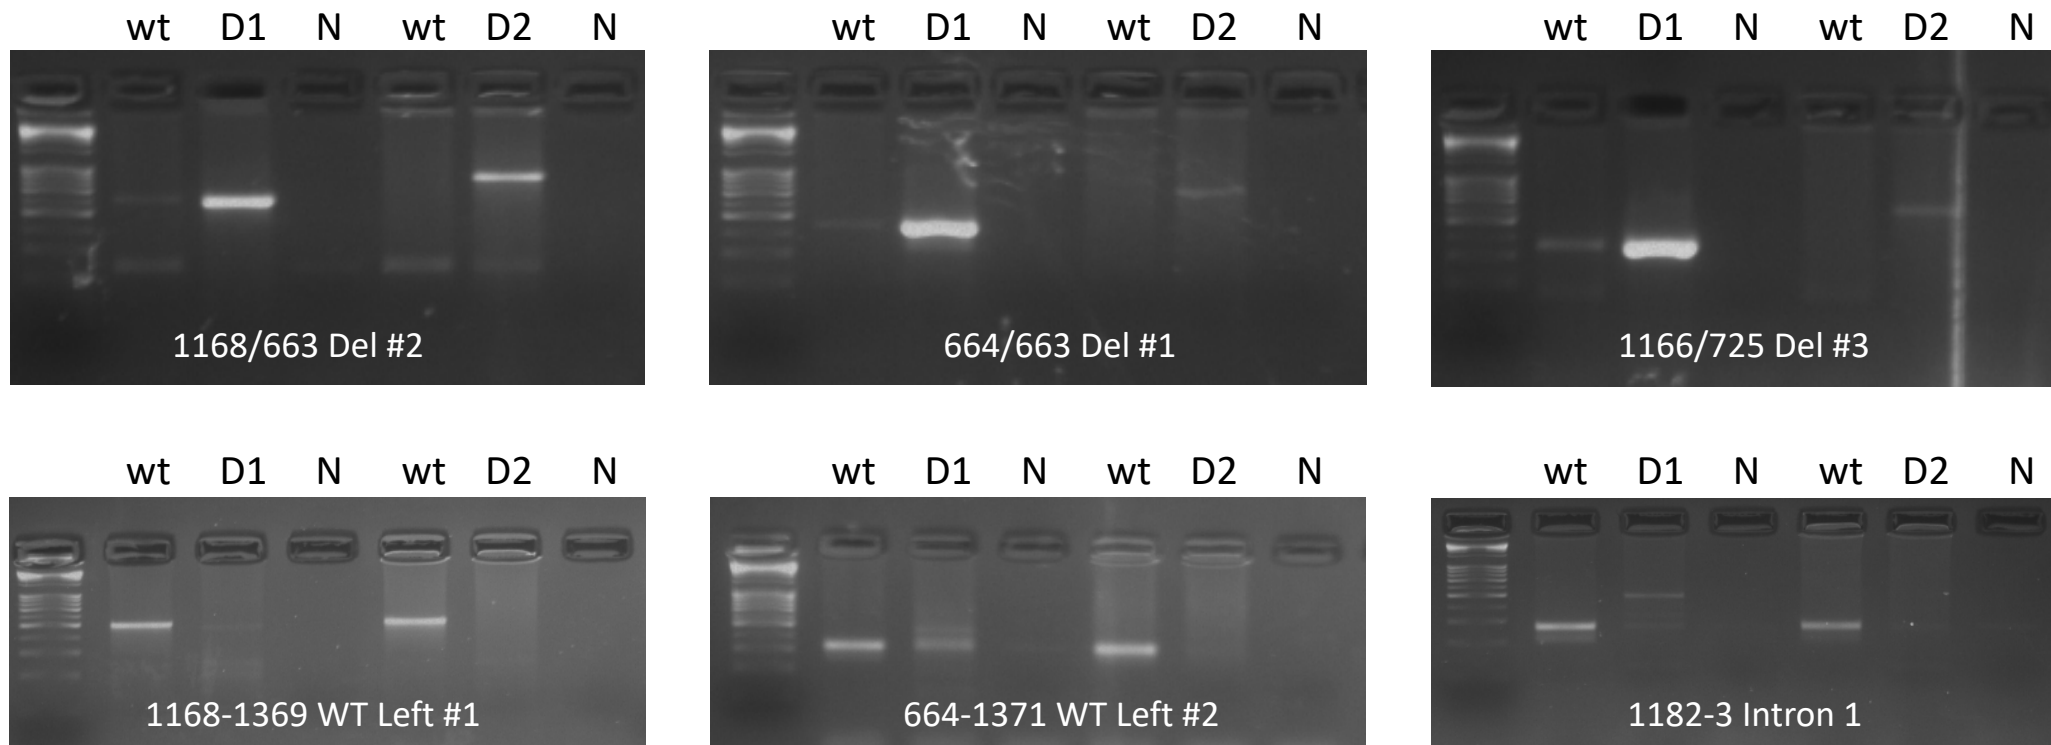

**S2 Fig. (A)** Extended PCR analysis of *Tubb2a* deletion alleles.

*Tubb2b*

Wt: Wild-type  
Del: D4185 homozygote  
N: negative control

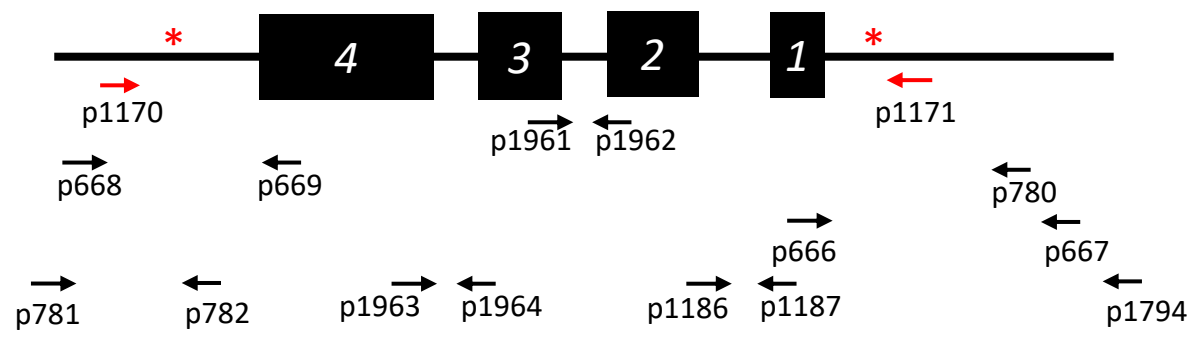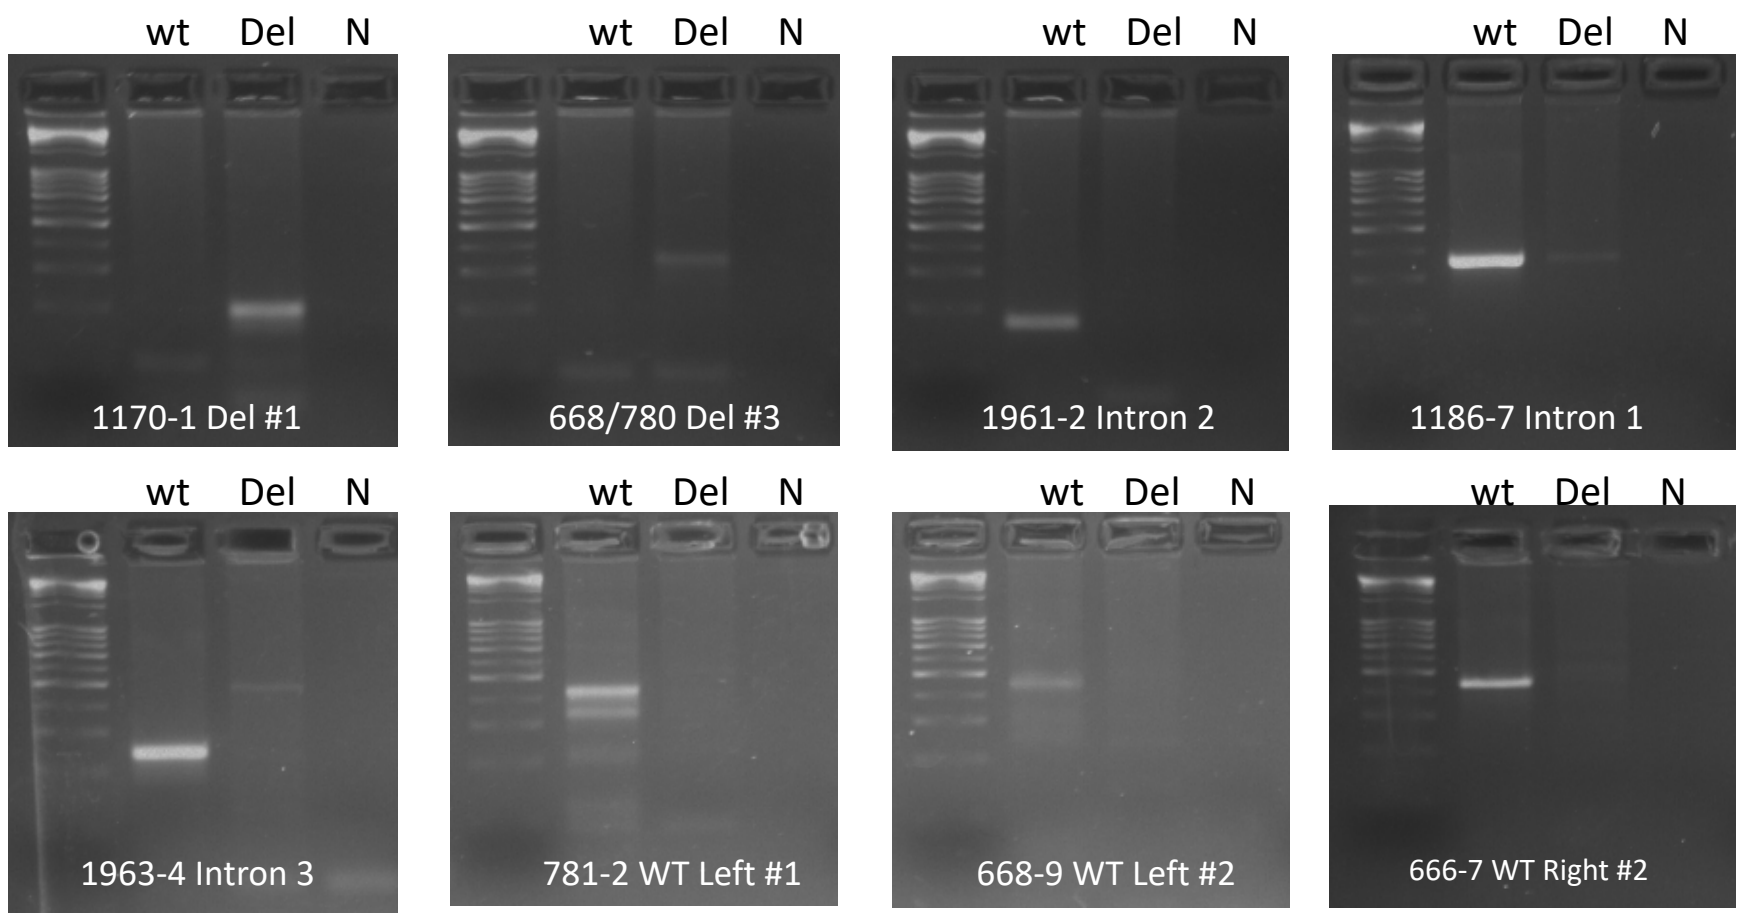

**S2 Fig. (B)** Extended PCR analysis of *Tubb2b* deletion alleles.

Wt: Wild-type  
 D1: D4304 homozygote  
 N: negative control  
 D2: D4262 homozygote

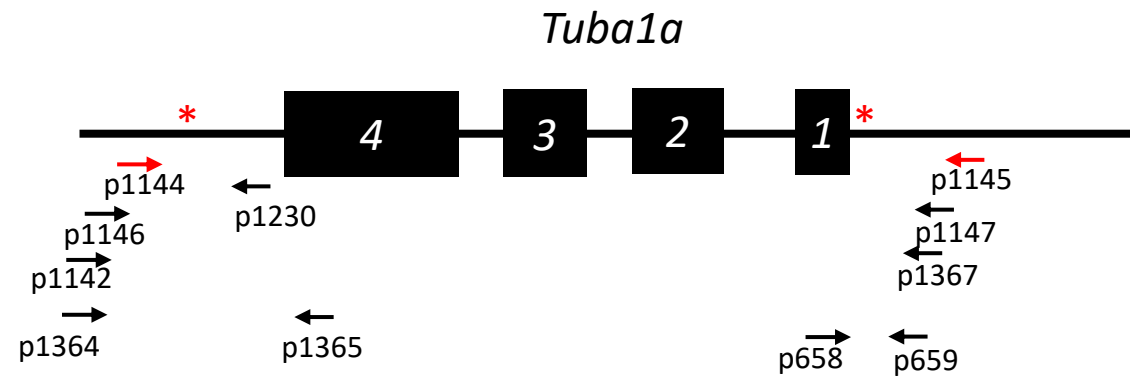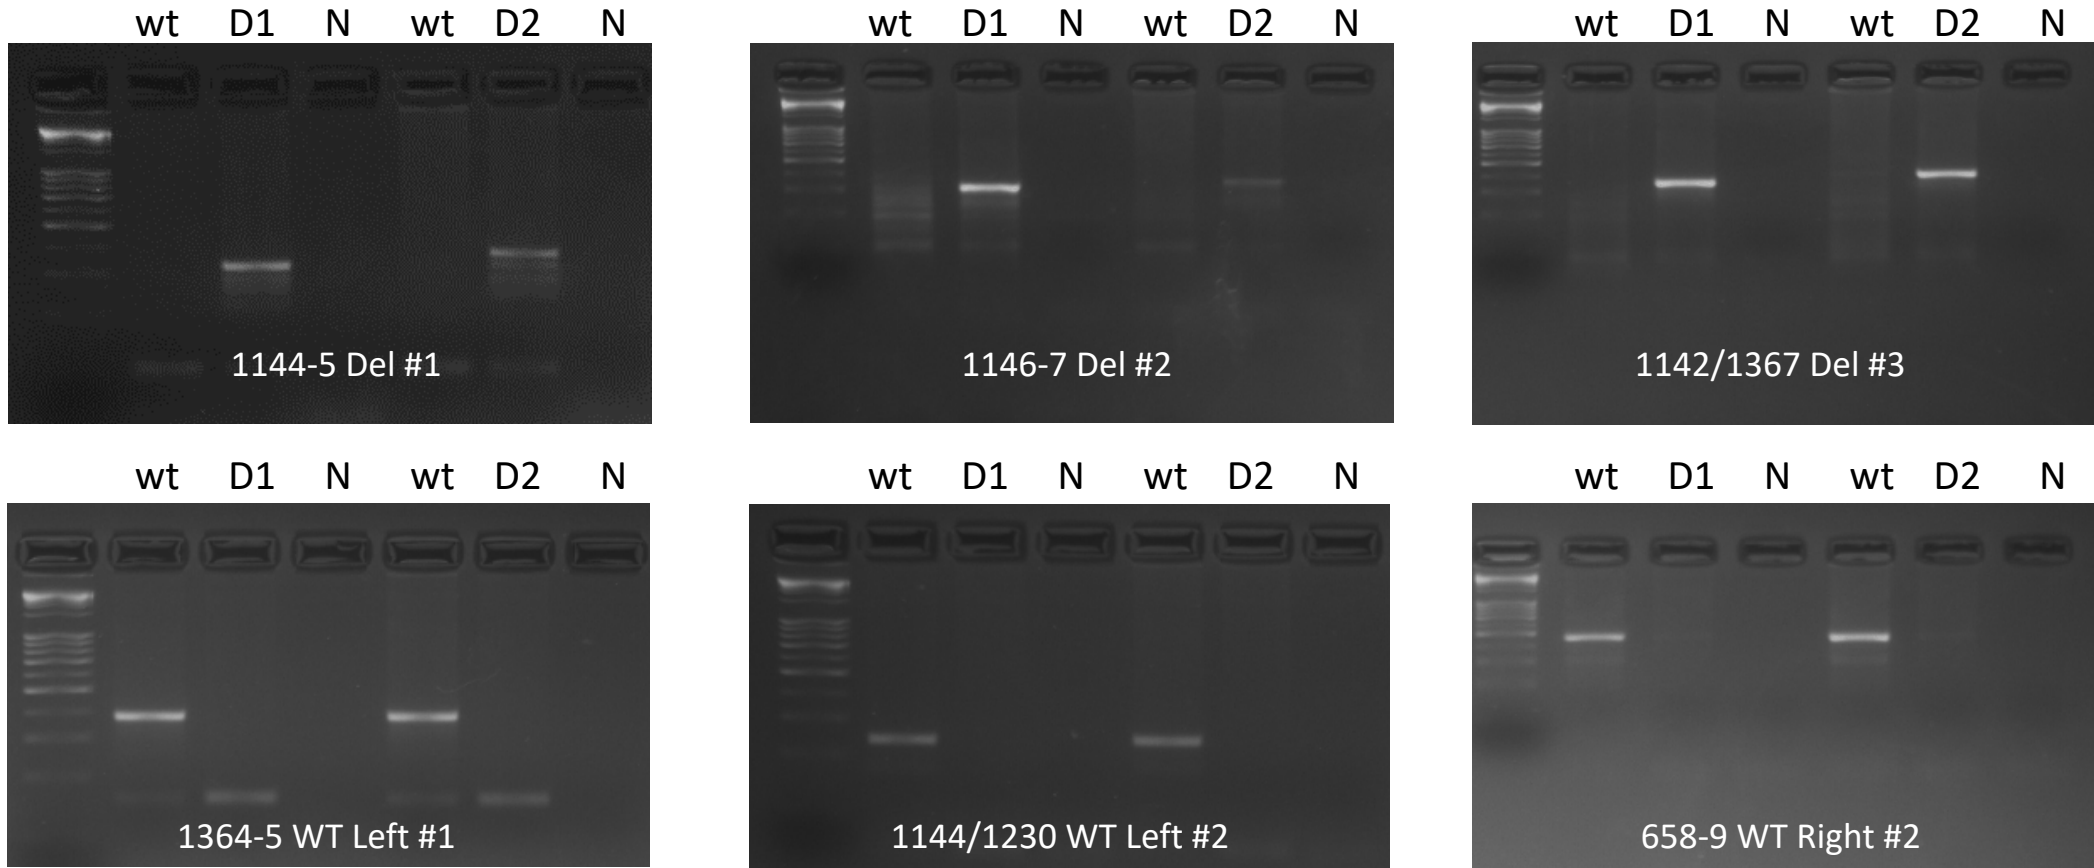

**S2 Fig. (C)** Extended PCR analysis of *Tuba1a* deletion alleles.
